# Supplementary material for: Gender Differences in the New Interdisciplinary Subject Informatik, Mathematik, Physik (IMP)—Sticking with STEM?
Source: MDPI journal article supplement (doi:10.3390/educsci13050478), 2023-05-09
Supplement: s1 [file s1]

## Liste der Codes

| Liste der Codes                                           | Häufigkeit |
|-----------------------------------------------------------|------------|
| Codesystem                                                | 2900       |
| Motives of IMP students for selecting CS in higher grades | 583        |
| future relevance                                          | 49         |
| positive influence family/friends                         | 11         |
| developing personal strenghts                             | 23         |
| positive influence of teachers                            | 34         |
| preserve all options                                      | 0          |
| relevant for other subjects                               | 0          |
| individual reasons                                        | 16         |
| good grades in the past                                   | 19         |
| contribution obligations                                  | 75         |
| programming                                               | 68         |
| interest in working methods (except programming)          | 13         |
| important for career ambitions/choice of studies          | 84         |
| positive self-concept                                     | 28         |
| subject and factual interest                              | 163        |
| Motives of IMP students for dropping CS in higher grades  | 867        |
| subject is not offered                                    | 26         |
| bad grades in the past                                    | 22         |

|                                                              |     |
|--------------------------------------------------------------|-----|
| irrelevant for other subjects                                | 7   |
| individual reasons                                           | 70  |
| negative influence of the teacher(s)                         | 54  |
| high workload/complexity of topics                           | 100 |
| not important for the career choice                          | 21  |
| negative associations with the subject computer science/ IMP | 43  |
| contribution obligations                                     | 153 |
| no subject and factual interest                              | 223 |
| negative self-concept                                        | 148 |
