# Supplementary material for: Gender Differences in the New Interdisciplinary Subject Informatik, Mathematik, Physik (IMP)—Sticking with STEM?
Source: MDPI journal article supplement (doi:10.3390/educsci13050478), 2023-05-09
Supplement: s1 [file s1]

|                                                 |                                                                                 |                                                                                     |
|-------------------------------------------------|---------------------------------------------------------------------------------|-------------------------------------------------------------------------------------|
| EvaSys                                          | <b>Fragebogen zum Interesse und Motivation von Schülerinnen und Schülern im</b> |  |
| Universität Stuttgart                           |                                                                                 | Tobias Bahr & Prof. Dr. Bernd Zinn                                                  |
| Institut für Erziehungswissenschaft - Abteilung |                                                                                 | Azebergstraße 12, 70174 Stuttgart                                                   |
| Berufspädagogik mit Schwerpunkt Technikdidaktik |                                                                                 | zinn@ife.uni-stuttgart.de Telefon: 0711 685-84360                                   |

Bitte so markieren: ☐ ☒ ☐ ☐ ☐ Bitte verwenden Sie einen Kugelschreiber oder nicht zu starken Filzstift. Dieser Fragebogen wird maschinell erfasst.  
 Korrektur: ☐ ☒ ☐ ☒ ☐ Bitte beachten Sie im Interesse einer optimalen Datenerfassung die links gegebenen Hinweise beim Ausfüllen.

## 1. Einleitung

**Bitte beachten Sie folgende Hinweise beim Ausfüllen des Fragebogens:**

- Nur mit einer ernst gemeinten Teilnahme leisten Sie einen wichtigen Beitrag zur Weiterentwicklung einer zukunftsfähigen Bildung im Fach IMP an allgemein bildenden Schulen in Baden-Württemberg.
- Beantworten Sie bitte alle Fragen eigenständig, gewissenhaft und ehrlich, sodass die Daten, die wir von Ihnen erhalten, auch die Realität abbilden.
- Lesen Sie bitte immer alles erst gut durch.
- Wenn Sie eine Frage haben oder irgendetwas unklar ist, dann wenden Sie sich bitte an den Testleiter, er hilft Ihnen gerne weiter.
- Setzen Sie pro Frage jeweils nur ein Kreuz pro Zeile in die vorhandenen Kästchen und nicht dazwischen.
- Die hier erhobenen Daten werden pseudonymisiert erfasst und nur für die im Informationsschreiben beschriebenen Zwecke verwendet.

### 1.1 Schülercode

Erster Buchstabe des **Vornamens der Mutter**

### 1.2 Zweiter Buchstabe des **Vornamens der Mutter**

### 1.3 Erster Buchstabe des **Vornamens des Vaters**

### 1.4 Zweiter Buchstabe des **Vornamens des Vaters**

### 1.5 Ihr **Geburtsmonat** zweistellig (z.B. 05 für Mai)

### 1.6 Ihr **Geburtsjahr** zweistellig (z.B. 89 für 1989)

## 2. Fragen zu Ihrer Person

2.1 Bitte tragen Sie ihr Alter ein

2.2 Bitte tragen Sie ihr Geschlecht ein

☐ männlich

☐ weiblich

☐ divers

## 3. Fragen zu Ihren Unterrichtsfächern

Kreuzen Sie bitte an, welches Unterrichtsfach Sie in der Schule haben.

Kreuzen Sie bitte ebenfalls an, wie sehr Sie sich dafür interessieren und was Ihre letzte Note war.

|                                                   | Angaben zur Kurswahl     |                          |                          |                          |                          | Das Fach finde ich...    |                          |                          |                          |  |
|---------------------------------------------------|--------------------------|--------------------------|--------------------------|--------------------------|--------------------------|--------------------------|--------------------------|--------------------------|--------------------------|--|
|                                                   | Basissfach               | Leistungsfach            | nicht belegt             | Ganz uninteressant       |                          |                          |                          | Sehr interessant         |                          |  |
| 3.1 Deutsch                                       | <input type="checkbox"/> |  |
| 3.2 Mathematik                                    | <input type="checkbox"/> |  |
| 3.3 1. Fremdsprache (z.B. Englisch):              | <input type="checkbox"/> |  |
| 3.4 2. Fremdsprache (z.B. Französisch):           | <input type="checkbox"/> |  |
| 3.5 Informatik                                    | <input type="checkbox"/> |  |
| 3.6 IMP                                           | <input type="checkbox"/> |  |
| 3.7 Physik                                        | <input type="checkbox"/> |  |
| 3.8 Chemie                                        | <input type="checkbox"/> |  |
| 3.9 Biologie                                      | <input type="checkbox"/> |  |
| 3.10 Geographie                                   | <input type="checkbox"/> |  |
| 3.11 Gemeinschaftskunde                           | <input type="checkbox"/> |  |
| 3.12 Geschichte                                   | <input type="checkbox"/> |  |
| 3.13 Wirtschaft / Berufs- und Studienorientierung | <input type="checkbox"/> |  |
| 3.14 Musik                                        | <input type="checkbox"/> |  |
| 3.15 Bildende Kunst                               | <input type="checkbox"/> |  |
| 3.16 Sport                                        | <input type="checkbox"/> |  |
| 3.17 Religion/Ethik                               | <input type="checkbox"/> |  |
| 3.18 Sonstiges: _____                             | <input type="checkbox"/> |  |

## 4. Fragen zu Ihrer Kurswahl in der Mittelstufe

- 4.1 Nennen Sie die drei für Sie wichtigsten Gründe warum Sie sich für das Profilfach IMP entschieden haben?

## 5. Fragen zu Ihrer Kurswahl in der Kursstufe

- 5.1 Nennen Sie die drei für Sie wichtigsten Gründe warum Sie sich für, bzw. gegen die Wahl des Fachs Informatik in der Kursstufe entschieden haben?

## 6. Fragen zu Ihren Erfahrungen im IMP-Unterricht

- 6.1 Beschreiben Sie ein kurzes Beispiel bei dem die Bereiche Informatik und Mathematik im IMP-Unterricht miteinander verknüpft wurden.

- 6.2 Beschreiben Sie ein kurzes Beispiel bei dem die Bereiche Informatik und Physik im IMP-Unterricht miteinander verknüpft wurden.

- 6.3 Beschreiben Sie ein kurzes Beispiel bei dem die Bereiche Mathematik und Physik im IMP-Unterricht miteinander verknüpft wurden.

- 6.4 Beschreiben Sie ein kurzes Beispiel bei dem die Bereiche Informatik, Mathematik und Physik im IMP-Unterricht miteinander verknüpft wurden.

## 7. Fachspezifisches Selbstkonzept

Bitte kreuzen Sie an, inwiefern Sie den Aussagen zustimmen.

|      |                                                                                                                            | Stimmt gar nicht         |                          |                          | Stimmt ganz genau        |
|------|----------------------------------------------------------------------------------------------------------------------------|--------------------------|--------------------------|--------------------------|--------------------------|
| 7.1  | In IMP bzw. der Informatik AG in der Mittelstufe schnitt ich in Klassenarbeiten gut ab.                                    | <input type="checkbox"/> | <input type="checkbox"/> | <input type="checkbox"/> | <input type="checkbox"/> |
| 7.2  | In IMP bzw. der Informatik AG in der Mittelstufe bekam ich gute Noten.                                                     | <input type="checkbox"/> | <input type="checkbox"/> | <input type="checkbox"/> | <input type="checkbox"/> |
| 7.3  | In IMP bzw. der Informatik AG in der Mittelstufe lernte ich schnell.                                                       | <input type="checkbox"/> | <input type="checkbox"/> | <input type="checkbox"/> | <input type="checkbox"/> |
| 7.4  | In IMP bzw. der Informatik AG in der Mittelstufe war ich ein hoffnungsloser Fall.                                          | <input type="checkbox"/> | <input type="checkbox"/> | <input type="checkbox"/> | <input type="checkbox"/> |
| 7.5  | Ich brauchte immer etwas mehr Zeit als die anderen, um Aufgaben in IMP bzw. der Informatik AG in der Mittelstufe zu lösen. | <input type="checkbox"/> | <input type="checkbox"/> | <input type="checkbox"/> | <input type="checkbox"/> |
| 7.6  | Für IMP bzw. der Informatik AG in der Mittelstufe hatte ich einfach keine Begabung.                                        | <input type="checkbox"/> | <input type="checkbox"/> | <input type="checkbox"/> | <input type="checkbox"/> |
| 7.7  | Egal wie sehr ich mich anstrengte, ich kam mit IMP bzw. der Informatik AG in der Mittelstufe einfach nicht zurecht.        | <input type="checkbox"/> | <input type="checkbox"/> | <input type="checkbox"/> | <input type="checkbox"/> |
| 7.8  | IMP bzw. die Informatik AG in der Mittelstufe fiel mir schwerer als den meisten anderen in meiner Klasse.                  | <input type="checkbox"/> | <input type="checkbox"/> | <input type="checkbox"/> | <input type="checkbox"/> |
| 7.9  | Ich war in IMP bzw. der Informatik AG in der Mittelstufe ganz gut.                                                         | <input type="checkbox"/> | <input type="checkbox"/> | <input type="checkbox"/> | <input type="checkbox"/> |
| 7.10 | Was wir in IMP bzw. der Informatik AG in der Mittelstufe durchnahmen, habe ich meistens verstanden.                        | <input type="checkbox"/> | <input type="checkbox"/> | <input type="checkbox"/> | <input type="checkbox"/> |

## 8. Ihre Einstellungen und Einschätzungen

Bitte geben Sie für jede Aussage an, wie Sie sich in Bezug auf Ihre Fähigkeiten im Fach IMP selbst einschätzen.

Wenn ich mir ansehe was wir in IMP können mussten...

|     |                                                                |                                 |                          |                          |                          |                          |                          |                           |
|-----|----------------------------------------------------------------|---------------------------------|--------------------------|--------------------------|--------------------------|--------------------------|--------------------------|---------------------------|
| 8.1 | ...halte ich mich in IMP für...                                | ...nicht begabt.                | <input type="checkbox"/> | ...sehr begabt.           |
| 8.2 | ...meine ich, dass mit das Lernen von neuen Inhalten in IMP... | ...schwer fiel.                 | <input type="checkbox"/> | ...leicht fiel.           |
| 8.3 | ...finde ich, dass ich mit den Aufgaben in IMP...              | ...nicht gut zurechtkam.        | <input type="checkbox"/> | ...gut zurechtkam.        |
| 8.4 | ...glaube ich, dass ich für IMP...                             | ...nicht intelligent genug war. | <input type="checkbox"/> | ...intelligent genug war. |
| 8.5 | ...finde ich, dass ich in IMP...                               | ...wenig konnte.                | <input type="checkbox"/> | ...viel konnte.           |

## 9. Soziales Selbstkonzept

Wie schätzen Sie sich in Bezug auf das Fach IMP im Vergleich zu anderen Mitschüler\*innen ein?

|     |                                          |                                                   |                          |                          |                          |                          |                          |                                               |
|-----|------------------------------------------|---------------------------------------------------|--------------------------|--------------------------|--------------------------|--------------------------|--------------------------|-----------------------------------------------|
| 9.1 | Ich denke, ich war in IMP...             | ...weniger begabt als meine Mitschüler*innen.     | <input type="checkbox"/> | ...begabter als meine Mitschüler*innen.       |
| 9.2 | In IMP etwas Neues zu lernen fiel mir... | ...schwerer als meinen Mitschüler*innen.          | <input type="checkbox"/> | ...leichter als meinen Mitschüler*innen.      |
| 9.3 | Mit den Aufgaben in IMP kam ich...       | ...schlechter zurecht als meine Mitschüler*innen. | <input type="checkbox"/> | ...besser zurecht als meine Mitschüler*innen. |

## 9. Soziales Selbstkonzept [Fortsetzung]

- |                                       |                                                     |                          |                          |                          |                          |                          |                                              |
|---------------------------------------|-----------------------------------------------------|--------------------------|--------------------------|--------------------------|--------------------------|--------------------------|----------------------------------------------|
| 9.4 Ich war in IMP...                 | ...nicht so intelligent wie meine Mitschüler*innen. | <input type="checkbox"/> | ...intelligenter als meine Mitschüler*innen. |
| 9.5 Die Aufgaben in IMP fielen mir... | ...schwerer als meinen Mitschüler*innen.            | <input type="checkbox"/> | ...leichter als meinen Mitschüler*innen.     |

## 10. Selbstkonzept (nur von Mädchen und divers zu beantworten)

**Wie schätzen Sie sich in Bezug auf das Fach IMP im Vergleich zum anderen Geschlecht ein?**

- |                                               |                                   |                          |                          |                          |                          |                          |                             |
|-----------------------------------------------|-----------------------------------|--------------------------|--------------------------|--------------------------|--------------------------|--------------------------|-----------------------------|
| 10.1 Ich denke, ich war in IMP...             | ...weniger begabt als die Jungen. | <input type="checkbox"/> | ...begabter als die Jungen. |
| 10.2 In IMP etwas Neues zu lernen fiel mir... | ...schwerer als den Jungen.       | <input type="checkbox"/> | ...leichter als den Jungen. |
| 10.3 Ich weiß über IMP...                     | ...weniger als die Jungen.        | <input type="checkbox"/> | ...mehr als die Jungen.     |
| 10.4 Die Aufgaben in IMP fielen mir...        | ...schwerer als den Jungen.       | <input type="checkbox"/> | ...leichter als den Jungen. |

## 11. Selbstkonzept (nur von Jungen und divers zu beantworten)

**Wie schätzen Sie sich in Bezug auf das Fach IMP im Vergleich zum anderen Geschlecht ein?**

- |                                               |                                    |                          |                          |                          |                          |                          |                              |
|-----------------------------------------------|------------------------------------|--------------------------|--------------------------|--------------------------|--------------------------|--------------------------|------------------------------|
| 11.1 Ich denke, ich war in IMP...             | ...weniger begabt als die Mädchen. | <input type="checkbox"/> | ...begabter als die Mädchen. |
| 11.2 In IMP etwas Neues zu lernen fiel mir... | ...schwerer als den Mädchen.       | <input type="checkbox"/> | ...leichter als den Mädchen. |
| 11.3 Ich weiß über IMP...                     | ...weniger als die Mädchen.        | <input type="checkbox"/> | ...mehr als die Mädchen.     |
| 11.4 Die Aufgaben in IMP fielen mir...        | ...schwerer als den Mädchen.       | <input type="checkbox"/> | ...leichter als den Mädchen. |

## 12. Ihre Einstellungen und Einschätzungen zum Fach Informatik in der Kursstufe

**(Bitte nur beantworten wenn Sie Informatik gewählt haben)**

**Kreuzen Sie bitte an, inwiefern die Aussagen auf Sie zutreffen.**

- |                                                                                                                                  |                          |                  |                          |  |                          |                          |
|----------------------------------------------------------------------------------------------------------------------------------|--------------------------|------------------|--------------------------|--|--------------------------|--------------------------|
|                                                                                                                                  |                          | Stimmt gar nicht |                          |  |                          | Stimmt ganz genau        |
| 12.1 Ich bin zuversichtlich, dass ich in Informatik in der Kursstufe gut zurechtkommen werde, wenn ich mich bemühe.              | <input type="checkbox"/> |                  | <input type="checkbox"/> |  | <input type="checkbox"/> | <input type="checkbox"/> |
| 12.2 Ich werde auch schwierige Aufgaben in Informatik in der Kursstufe lösen können, wenn ich mich anstrenge.                    | <input type="checkbox"/> |                  | <input type="checkbox"/> |  | <input type="checkbox"/> | <input type="checkbox"/> |
| 12.3 Selbst wenn ich mal längere Zeit krank sein sollte, werde ich noch gute Leistungen in Informatik in der Kursstufe erzielen. | <input type="checkbox"/> |                  | <input type="checkbox"/> |  | <input type="checkbox"/> | <input type="checkbox"/> |

## 12. Ihre Einstellungen und Einschätzungen zum Fach Informatik in der Kursstufe [Fortsetzung]

- |                                                                                                                                                   |                          |                          |                          |                          |
|---------------------------------------------------------------------------------------------------------------------------------------------------|--------------------------|--------------------------|--------------------------|--------------------------|
| 12.4 Auch wenn der Lehrer das Tempo noch mehr anzieht, werde ich die geforderten Leistungen in Informatik in der Kursstufe erbringen können.      | <input type="checkbox"/> | <input type="checkbox"/> | <input type="checkbox"/> | <input type="checkbox"/> |
| 12.5 Ich bin sicher, dass ich gute Leistungen in Informatik in der Kursstufe erzielen werde, auch wenn der Lehrer an meinen Fähigkeiten zweifelt. | <input type="checkbox"/> | <input type="checkbox"/> | <input type="checkbox"/> | <input type="checkbox"/> |
| 12.6 Ich werde auch dann gute Leistungen in Informatik in der Kursstufe erzielen, wenn der Lehrer den Stoff schlecht vermittelt.                  | <input type="checkbox"/> | <input type="checkbox"/> | <input type="checkbox"/> | <input type="checkbox"/> |
| 12.7 Ich bin überzeugt, dass ich auch bei der Behandlung eines größeren Stoffumfangs dem Informatik-Unterricht der Kursstufe gut folgen kann.     | <input type="checkbox"/> | <input type="checkbox"/> | <input type="checkbox"/> | <input type="checkbox"/> |

## 13. Motivation

Bitte geben Sie an, wie motiviert Sie im IMP-Unterricht waren.

Im IMP-Unterricht der letzten Wochen...

- |                                                                                                                                          |                          |                          |                          |                          |                          |
|------------------------------------------------------------------------------------------------------------------------------------------|--------------------------|--------------------------|--------------------------|--------------------------|--------------------------|
|                                                                                                                                          | Trifft nicht zu          |                          |                          |                          | Trifft zu                |
| 13.1 ...habe ich versucht mich zu drücken.                                                                                               | <input type="checkbox"/> |
| 13.2 ...war ich mit meinen Gedanken oft woanders.                                                                                        | <input type="checkbox"/> |
| 13.3 ...war mir alles egal.                                                                                                              | <input type="checkbox"/> |
| 13.4 ...habe ich mich nur angestrengt, damit ich keinen Ärger bekomme.                                                                   | <input type="checkbox"/> |
| 13.5 ...habe ich nur etwas getan/gelernt, wenn ich unter Druck (Lehrer, Eltern,...) gesetzt wurde.                                       | <input type="checkbox"/> |
| 13.6 ...habe ich nur das getan/gelernt, was ausdrücklich von mir verlangt wurde.                                                         | <input type="checkbox"/> |
| 13.7 ...versuchte ich alles so zu erledigen, wie es von mir erwartet wurde.                                                              | <input type="checkbox"/> |
| 13.8 ...habe ich mich angestrengt, wie sich das für einen guten Schüler gehört.                                                          | <input type="checkbox"/> |
| 13.9 ...habe ich mich selbst unter Druck gesetzt, um alles möglichst richtig zu machen.                                                  | <input type="checkbox"/> |
| 13.10...habe ich mich angestrengt, weil ich die Inhalte für die Schule/Zukunft können muss.                                              | <input type="checkbox"/> |
| 13.11...war es mir wichtig, die Unterrichtsinhalte zu verstehen.                                                                         | <input type="checkbox"/> |
| 13.12...habe ich im Unterricht mitgemacht, um meinen eigenen Zielen (z. B. gute mündliche Note, Berufswunsch) ein Stück näher zu kommen. | <input type="checkbox"/> |
| 13.13...machte das Lernen richtig Spaß.                                                                                                  | <input type="checkbox"/> |
| 13.14...fand ich das Thema so interessant, dass ich richtig gut mitgearbeitet habe.                                                      | <input type="checkbox"/> |
| 13.15...verging die Zeit wie im Flug.                                                                                                    | <input type="checkbox"/> |
| 13.16...war ich neugierig/wissbegierig.                                                                                                  | <input type="checkbox"/> |
| 13.17...befasste ich mich mit spannenden Problemen, über die ich mehr erfahren will.                                                     | <input type="checkbox"/> |
| 13.18...stieß ich auf spannende Themen, über die ich mit anderen sprechen will.                                                          | <input type="checkbox"/> |

## 14. Fragen zu Ihren bereichsspezifischen Interessen

**Sprachlich-literarisch-künstlerische Fächer:** *Deutsch, Fremdsprachen, Musik und Bildende Kunst*

**Gesellschaftswissenschaftliche Fächer:** *Geschichte, Geographie, Gemeinschaftskunde, Religionslehre und Ethik*

**Mathematisch-informatisch-naturwissenschaftlich-technische Fächer:** *Mathematik, Informatik, BNT, Naturphänomene, NwT, Physik, Chemie, Biologie*

**Kreuzen Sie bitte die folgenden Aussagen an.**

**Wie ist Ihr Interesse in den Unterrichtsfächern?**

|                                                                                                                         | Trifft nicht zu          |                          |                          | Trifft zu                |
|-------------------------------------------------------------------------------------------------------------------------|--------------------------|--------------------------|--------------------------|--------------------------|
| <i>Sprachlich-literarisch-künstlerische Fächer:</i>                                                                     |                          |                          |                          |                          |
| 14.1 Wie viel liegt Ihnen daran, in sprachlich-literarisch-künstlerischen Fächern viel zu wissen?                       | <input type="checkbox"/> | <input type="checkbox"/> | <input type="checkbox"/> | <input type="checkbox"/> |
| 14.2 Wie gerne würden Sie in sprachlich-literarisch-künstlerischen Fächern noch mehr Stunden haben als bisher?          | <input type="checkbox"/> | <input type="checkbox"/> | <input type="checkbox"/> | <input type="checkbox"/> |
| 14.3 Wie sehr freuen Sie sich auf eine Stunde in einem sprachlich-literarisch-künstlerischen Fach?                      | <input type="checkbox"/> | <input type="checkbox"/> | <input type="checkbox"/> | <input type="checkbox"/> |
| 14.4 Wie viel liegt Ihnen daran, den Stoff der sprachlich-literarisch-künstlerischen Fächer zu behalten?                | <input type="checkbox"/> | <input type="checkbox"/> | <input type="checkbox"/> | <input type="checkbox"/> |
| <i>Gesellschaftswissenschaftliche Fächer:</i>                                                                           |                          |                          |                          |                          |
| 14.5 Wie viel liegt Ihnen daran, in gesellschaftswissenschaftliche Fächern viel zu wissen?                              | <input type="checkbox"/> | <input type="checkbox"/> | <input type="checkbox"/> | <input type="checkbox"/> |
| 14.6 Wie gerne würden Sie in gesellschaftswissenschaftliche Fächern noch mehr Stunden haben als bisher?                 | <input type="checkbox"/> | <input type="checkbox"/> | <input type="checkbox"/> | <input type="checkbox"/> |
| 14.7 Wie sehr freuen Sie sich auf eine Stunde in einem gesellschaftswissenschaftliche Fach?                             | <input type="checkbox"/> | <input type="checkbox"/> | <input type="checkbox"/> | <input type="checkbox"/> |
| 14.8 Wie viel liegt Ihnen daran, den Stoff der gesellschaftswissenschaftliche Fächer zu behalten?                       | <input type="checkbox"/> | <input type="checkbox"/> | <input type="checkbox"/> | <input type="checkbox"/> |
| <i>Mathematisch-informatisch-naturwissenschaftlich-technische Fächer:</i>                                               |                          |                          |                          |                          |
| 14.9 Wie viel liegt Ihnen daran, in mathematisch-naturwissenschaftlich-technische Fächern viel zu wissen?               | <input type="checkbox"/> | <input type="checkbox"/> | <input type="checkbox"/> | <input type="checkbox"/> |
| 14.10 Wie gerne würden Sie in mathematisch-naturwissenschaftlich-technische Fächern noch mehr Stunden haben als bisher? | <input type="checkbox"/> | <input type="checkbox"/> | <input type="checkbox"/> | <input type="checkbox"/> |
| 14.11 Wie sehr freuen Sie sich auf eine Stunde in einem mathematisch-naturwissenschaftlich-technische Fach?             | <input type="checkbox"/> | <input type="checkbox"/> | <input type="checkbox"/> | <input type="checkbox"/> |
| 14.12 Wie viel liegt Ihnen daran, den Stoff der mathematisch-naturwissenschaftlich-technische Fächer zu behalten?       | <input type="checkbox"/> | <input type="checkbox"/> | <input type="checkbox"/> | <input type="checkbox"/> |

## 15. Fragen zum Fachinteresse

**Kreuzen Sie bitte bei jeder Aussage an, wie sehr die Aussage auf Sie zutrifft.**

|                                                                                                               | Trifft nicht zu          |                          |                          | Trifft zu                |
|---------------------------------------------------------------------------------------------------------------|--------------------------|--------------------------|--------------------------|--------------------------|
| 15.1 Ich bin mir sicher, mit IMP das Fach gewählt zu haben, welches meinen persönlichen Neigungen entspricht. | <input type="checkbox"/> | <input type="checkbox"/> | <input type="checkbox"/> | <input type="checkbox"/> |

# MUSTER

EvaSys

Fragebogen zum Interesse und Motivation von Schülerinnen und Schülern im

Electric Paper  
EVALUATIONSSYSTEME

## 15. Fragen zum Fachinteresse [Fortsetzung]

- |                                                                                                                                                                                 |                          |                          |                          |                          |
|---------------------------------------------------------------------------------------------------------------------------------------------------------------------------------|--------------------------|--------------------------|--------------------------|--------------------------|
| 15.2 Nach einem langen Wochenende oder Urlaub habe ich mich wieder auf den IMP-Unterricht gefreut.                                                                              | <input type="checkbox"/> | <input type="checkbox"/> | <input type="checkbox"/> | <input type="checkbox"/> |
| 15.3 Wenn ich genügend Zeit hätte, würde ich mich mit bestimmten Fragen des IMP-Unterrichts, unabhängig von Klausuranforderungen, intensiver beschäftigen.                      | <input type="checkbox"/> | <input type="checkbox"/> | <input type="checkbox"/> | <input type="checkbox"/> |
| 15.4 Ich bin sicher, dass IMP meine Persönlichkeit positiv beeinflusst hat.                                                                                                     | <input type="checkbox"/> | <input type="checkbox"/> | <input type="checkbox"/> | <input type="checkbox"/> |
| 15.5 Die Beschäftigung mit den informatischen, mathematischen und physikalischen Inhalten von IMP hatte für mich eigentlich recht wenig mit Selbstverwirklichung zu tun.        | <input type="checkbox"/> | <input type="checkbox"/> | <input type="checkbox"/> | <input type="checkbox"/> |
| 15.6 Wenn ich in einer Bibliothek oder einem Buchladen bin, schmökere ich gerne in Zeitschriften oder Büchern, die Themen aus dem IMP-Unterricht ansprechen.                    | <input type="checkbox"/> | <input type="checkbox"/> | <input type="checkbox"/> | <input type="checkbox"/> |
| 15.7 Ich rede lieber über meine Hobbies als über Themen aus dem IMP-Unterricht.                                                                                                 | <input type="checkbox"/> | <input type="checkbox"/> | <input type="checkbox"/> | <input type="checkbox"/> |
| 15.8 Es war für mich von großer Bedeutung, gerade IMP als Fach wählen zu können.                                                                                                | <input type="checkbox"/> | <input type="checkbox"/> | <input type="checkbox"/> | <input type="checkbox"/> |
| 15.9 Ich hatte das Fach IMP vor allem wegen der interessanten und besonderen Unterrichtsinhalte gewählt.                                                                        | <input type="checkbox"/> | <input type="checkbox"/> | <input type="checkbox"/> | <input type="checkbox"/> |
| 15.10 Schon vor der Mittelstufe hatten die Fachgebiete Informatik, Mathematik, Physik für mich einen hohen Stellenwert.                                                         | <input type="checkbox"/> | <input type="checkbox"/> | <input type="checkbox"/> | <input type="checkbox"/> |
| 15.11 Im Vergleich zu anderen mir sehr wichtigen Dingen (z.B. Hobbies, soziale Beziehungen) maß ich dem IMP-Unterricht eher eine geringe Bedeutung bei.                         | <input type="checkbox"/> | <input type="checkbox"/> | <input type="checkbox"/> | <input type="checkbox"/> |
| 15.12 Die Beschäftigung mit bestimmten Stoffinhalten aus dem IMP-Unterricht wirkte sich positiv auf meine Stimmung aus.                                                         | <input type="checkbox"/> | <input type="checkbox"/> | <input type="checkbox"/> | <input type="checkbox"/> |
| 15.13 Wenn ich ehrlich sein soll, war mir der IMP-Unterricht manchmal eher gleichgültig.                                                                                        | <input type="checkbox"/> | <input type="checkbox"/> | <input type="checkbox"/> | <input type="checkbox"/> |
| 15.14 Die Beschäftigung mit bestimmten informatischen, mathematischen und physikalischen Unterrichtsinhalten war mir wichtiger als Zerstreuung, Freizeit und Unterhaltung.      | <input type="checkbox"/> | <input type="checkbox"/> | <input type="checkbox"/> | <input type="checkbox"/> |
| 15.15 Es gibt viele informatische, mathematische und physikalische Bereiche in IMP, die mich innerlich gleichgültig lassen.                                                     | <input type="checkbox"/> | <input type="checkbox"/> | <input type="checkbox"/> | <input type="checkbox"/> |
| 15.16 Die Beschäftigung mit den Inhalten und Problemen des Fachs IMP gehörte nicht gerade zu meinen Lieblingstätigkeiten.                                                       | <input type="checkbox"/> | <input type="checkbox"/> | <input type="checkbox"/> | <input type="checkbox"/> |
| 15.17 Schon vor der Mittelstufe habe ich mich freiwillig mit Inhalten des IMP-Unterrichts auseinandergesetzt (z.B. Bücher lesen, Internetrecherche, Dokumentationen anschauen). | <input type="checkbox"/> | <input type="checkbox"/> | <input type="checkbox"/> | <input type="checkbox"/> |
| 15.18 Über Inhalte des IMP-Kurses zu reden, machte mir nur selten Spaß.                                                                                                         | <input type="checkbox"/> | <input type="checkbox"/> | <input type="checkbox"/> | <input type="checkbox"/> |

## 16. Ihr Sachinteresse

Bitte geben Sie an wie sehr oder wie wenig Sie sich für die folgenden Themen aus der Informatik interessieren. Mein Interesse daran war...

- |                                                                    | sehr gering              | gering                   | mittel                   | groß                     | sehr groß                |
|--------------------------------------------------------------------|--------------------------|--------------------------|--------------------------|--------------------------|--------------------------|
| 16.1 Mehr über Fehlererkennung, Fehlerkorrekturverfahren erfahren. | <input type="checkbox"/> |
| 16.2 Mehr über Listen, Bäume und Graphen erfahren.                 | <input type="checkbox"/> |
| 16.3 Mehr über das Thema Logik zu erfahren.                        | <input type="checkbox"/> |
| 16.4 Mehr über das Thema Algorithmen zu erfahren.                  | <input type="checkbox"/> |
| 16.5 Mehr über das Implementieren von Code zu erfahren.            | <input type="checkbox"/> |
| 16.6 Mehr über das Kommentieren von Code erfahren.                 | <input type="checkbox"/> |
| 16.7 Mehr über Anforderungen an Programme zu erfahren.             | <input type="checkbox"/> |
| 16.8 Mehr über das Testen von Programmen zu erfahren.              | <input type="checkbox"/> |
| 16.9 Mehr über Softwareprojekte zu erfahren.                       | <input type="checkbox"/> |

## 16. Ihr Sachinteresse [Fortsetzung]

|                                                                        |                          |                          |                          |                          |                          |
|------------------------------------------------------------------------|--------------------------|--------------------------|--------------------------|--------------------------|--------------------------|
| 16.10 Mehr über Rechnernetze zu erfahren.                              | <input type="checkbox"/> |
| 16.11 Mehr über Kommunikation in Netzen zu erfahren.                   | <input type="checkbox"/> |
| 16.12 Mehr über Verschlüsselungsverfahren zu erfahren.                 | <input type="checkbox"/> |
| 16.13 Mehr über das Thema Umgang mit personenbezogenen Daten erfahren. | <input type="checkbox"/> |

## 17. Berufliche Interessen

Bitte geben Sie für jede der folgenden Tätigkeiten an, ob diese Sie interessieren und ob Sie diese beruflich machen würden.

1 = interessiert mich gar nicht würde ich gar nicht gerne tun

5 = interessiert mich sehr würde ich sehr gerne tun

|                                                                                                             | 1                        | 2                        | 3                        | 4                        | 5                        |
|-------------------------------------------------------------------------------------------------------------|--------------------------|--------------------------|--------------------------|--------------------------|--------------------------|
| 17.1 Sachen herstellen, anfertigen oder reparieren                                                          | <input type="checkbox"/> |
| 17.2 in einem Forschungsinstitut oder Labor arbeiten (etwas untersuchen, experimentieren oder entwickeln)   | <input type="checkbox"/> |
| 17.3 in einer Schauspiel- oder Musikgruppe spielen                                                          | <input type="checkbox"/> |
| 17.4 andere Menschen betreuen oder pflegen, erziehen oder unterrichten                                      | <input type="checkbox"/> |
| 17.5 koordinierende, leitende, kontrollierende oder organisatorische Aufgaben übernehmen                    | <input type="checkbox"/> |
| 17.6 in einem Büro arbeiten, Geschäftsbriefe schreiben oder Angebote einholen und vergleichen               | <input type="checkbox"/> |
| 17.7 Geräte, Maschinen, Anlagen bauen, bedienen, reparieren oder warten                                     | <input type="checkbox"/> |
| 17.8 ein Computerprogramm entwickeln                                                                        | <input type="checkbox"/> |
| 17.9 Dinge tun, bei denen es auf Kreativität und Fantasie ankommt, etwas mit sprachlichen Mitteln gestalten | <input type="checkbox"/> |
| 17.10 therapeutisch, psychologisch oder pädagogisch tätig sein                                              | <input type="checkbox"/> |
| 17.11 mit anderen Menschen diskutieren, sie überzeugen und mit ihnen verhandeln                             | <input type="checkbox"/> |
| 17.12 Akten/ Geschäftsbriefe/ Listen/ Statistiken erstellen oder verwalten                                  | <input type="checkbox"/> |
| 17.13 körperlich oder zumindest mit einem Werkzeug arbeiten (Baustelle, Werkstatt oder Firma)               | <input type="checkbox"/> |
| 17.14 sich mit der Chemie, Physik, Biologie oder Mathematik beschäftigen                                    | <input type="checkbox"/> |
| 17.15 fotografieren, filmen, dekorieren oder andere kreative Dinge machen                                   | <input type="checkbox"/> |
| 17.16 für Kranke, Verletzte, Kinder oder hilfsbedürftige Menschen sorgen bzw. ihnen helfen                  | <input type="checkbox"/> |

## 18. Ihr Bildungsplan

Kreuzen Sie bitte bei jeder Aussage an, wie sehr die Aussage auf Sie zutrifft.

|                                                                                                                                              | Trifft nicht zu          |                          |                          | Trifft zu                |
|----------------------------------------------------------------------------------------------------------------------------------------------|--------------------------|--------------------------|--------------------------|--------------------------|
| 18.1 Ich kann mir vorstellen, ein Studium oder einen Beruf im Bereich Naturwissenschaften oder Ingenieurwissenschaften/Technik zu ergreifen. | <input type="checkbox"/> | <input type="checkbox"/> | <input type="checkbox"/> | <input type="checkbox"/> |
| 18.2 Ich kann mir vorstellen, ein Studium oder Beruf im Bereich Mathematik oder Informatik zu ergreifen.                                     | <input type="checkbox"/> | <input type="checkbox"/> | <input type="checkbox"/> | <input type="checkbox"/> |

## 18. Ihr Bildungsplan [Fortsetzung]

|                                                                                                                 |                          |                          |                          |                          |
|-----------------------------------------------------------------------------------------------------------------|--------------------------|--------------------------|--------------------------|--------------------------|
| 18.3 Ich kann mir vorstellen, ein Studium oder Beruf im Bereich Gesundheit und Medizin zu ergreifen.            | <input type="checkbox"/> | <input type="checkbox"/> | <input type="checkbox"/> | <input type="checkbox"/> |
| 18.4 Ich kann mir vorstellen, ein Studium oder Beruf im Bereich Wirtschaft oder Recht zu ergreifen.             | <input type="checkbox"/> | <input type="checkbox"/> | <input type="checkbox"/> | <input type="checkbox"/> |
| 18.5 Ich kann mir vorstellen, ein Studium oder Beruf im Bereich Gesellschaftswissenschaften zu ergreifen.       | <input type="checkbox"/> | <input type="checkbox"/> | <input type="checkbox"/> | <input type="checkbox"/> |
| 18.6 Ich kann mir vorstellen, ein Studium oder Beruf im Bereich Medien oder Kommunikation zu ergreifen.         | <input type="checkbox"/> | <input type="checkbox"/> | <input type="checkbox"/> | <input type="checkbox"/> |
| 18.7 Ich kann mir vorstellen, ein Studium oder Beruf im Bereich Kunst, Gestaltung oder Musik zu ergreifen.      | <input type="checkbox"/> | <input type="checkbox"/> | <input type="checkbox"/> | <input type="checkbox"/> |
| 18.8 Ich kann mir vorstellen, ein Studium oder Beruf im Bereich Sprach- oder Kulturwissenschaften zu ergreifen. | <input type="checkbox"/> | <input type="checkbox"/> | <input type="checkbox"/> | <input type="checkbox"/> |

## 19. Bildungswahlentscheidung

**Bewerten Sie die nachfolgenden Faktoren im Hinblick auf Ihre Bedeutung für Ihre Bildungswahlentscheidung (Studien- bzw. Berufsrichtung)**

|                                                                             | unwichtig                |                          |                          |                          |                          |                          |                          |                          |                          |                          | ganz wichtig             |                          |                          |                          |                          |                          |                          |                          |                          |                          |
|-----------------------------------------------------------------------------|--------------------------|--------------------------|--------------------------|--------------------------|--------------------------|--------------------------|--------------------------|--------------------------|--------------------------|--------------------------|--------------------------|--------------------------|--------------------------|--------------------------|--------------------------|--------------------------|--------------------------|--------------------------|--------------------------|--------------------------|
| 19.1 Schulunterricht                                                        | <input type="checkbox"/> |
| 19.2 Menschen (z.B. Eltern, Bildungsberater, Freunde)                       | <input type="checkbox"/> |
| 19.3 Außerschulische Erfahrungen (z.B. Förderprogramme, Austauschprogramme) | <input type="checkbox"/> |
| 19.4 Interesse und eigene Motivation                                        | <input type="checkbox"/> |
| 19.5 Selbstvertrauen in die eigenen Fähigkeiten                             | <input type="checkbox"/> |
| 19.6 Soziologische Einflüsse (z.B. Geschlecht, Stereotype, Vorstellungen)   | <input type="checkbox"/> |
| 19.7 Berufsperspektiven                                                     | <input type="checkbox"/> |
| 19.8 Studienplan                                                            | <input type="checkbox"/> |
| 19.9 Studienort                                                             | <input type="checkbox"/> |

## 20. Ihre Noten

**Bitte tragen Sie Ihre letzte Note in dem jeweiligen Fach ein.**

20.1 Deutsch

20.2 Mathematik

20.3 1. Fremdsprache (z.B. Englisch): \_\_\_\_\_

20.4 2. Fremdsprache (z.B. Französisch): \_\_\_\_\_

20.5 Informatik

## 20. Ihre Noten [Fortsetzung]

20.6 Informatik, Mathematik, Physik (IMP)

20.7 Physik

20.8 Chemie

20.9 Biologie

20.10 Geographie

20.11 Gemeinschaftskunde

20.12 Geschichte

20.13 Wirtschaft / Berufs- und Studienorientierung

20.14 Musik

20.15 Bildende Kunst

20.16 Sport

20.17 Religion/Ethik

20.18 Sonstiges: \_\_\_\_\_

## 21. Abschlussfragen

## 21. Abschlussfragen [Fortsetzung]

21.1 Was hat Ihnen am IMP-Unterricht gefallen?

21.2 Was könnte noch besser gemacht werden?

21.3 Wie beurteilen Sie die technologischen Möglichkeiten im IMP-Unterricht an Ihrer Schule?

21.4 Bitte nennen Sie stichwortartig welche Programmiersprache Sie anwenden.

## 21. Abschlussfragen [Fortsetzung]

21.5 Hier haben Sie Platz für weitere Anmerkungen und Feedback zum IMP-Unterricht.

21.6 Hier haben Sie Platz für Ihr Feedback zur Umfrage

**VIELEN DANK FÜR IHRE TEILNAHME!**
